# Supplementary material for: Mental distress and health‐related quality of life among type 1 and type 2 diabetes patients using self‐monitoring of blood glucose: A cross‐sectional questionnaire study in Japan
Source: PubMed Central journal article supplement — J Diabetes Investig. 2018 Apr 1;9(5):1203–11. doi: 10.1111/jdi.12827 (PMC6123045; doi:10.1111/jdi.12827), 2018-04-01
Supplement: JDI-9-1203-s001.pdf [file JDI-9-1203-s001.pdf]

# Figure S1

## A. Hypoglycemia-related DTR-QOL and injection types

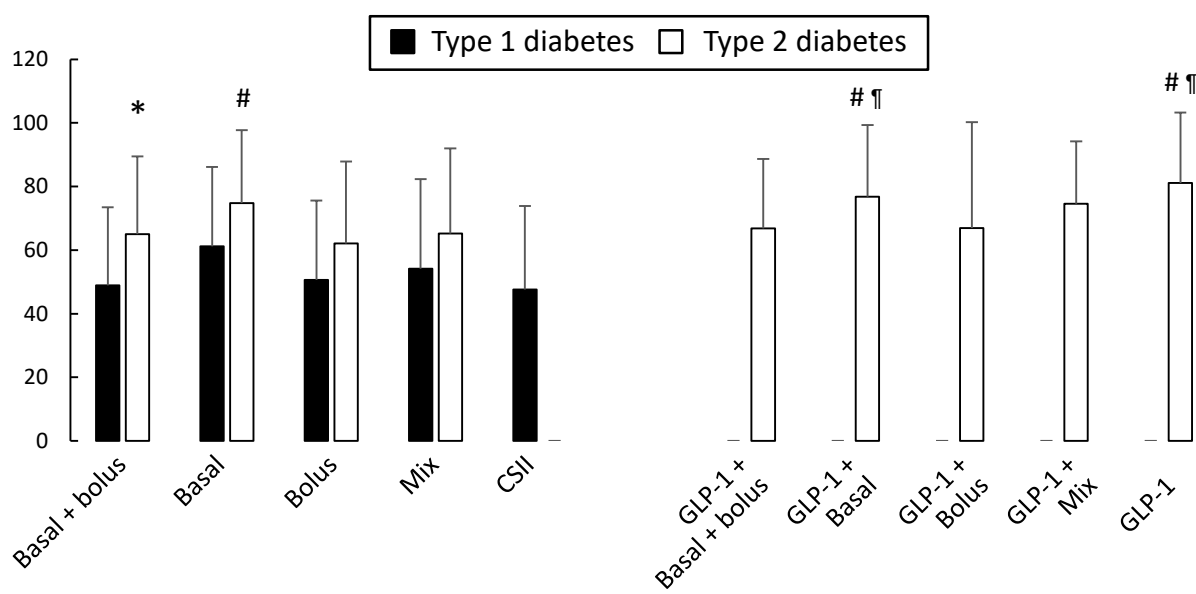

## B. Associations of POMS2 AH and TA with hypoglycemia-related DTR-QOL

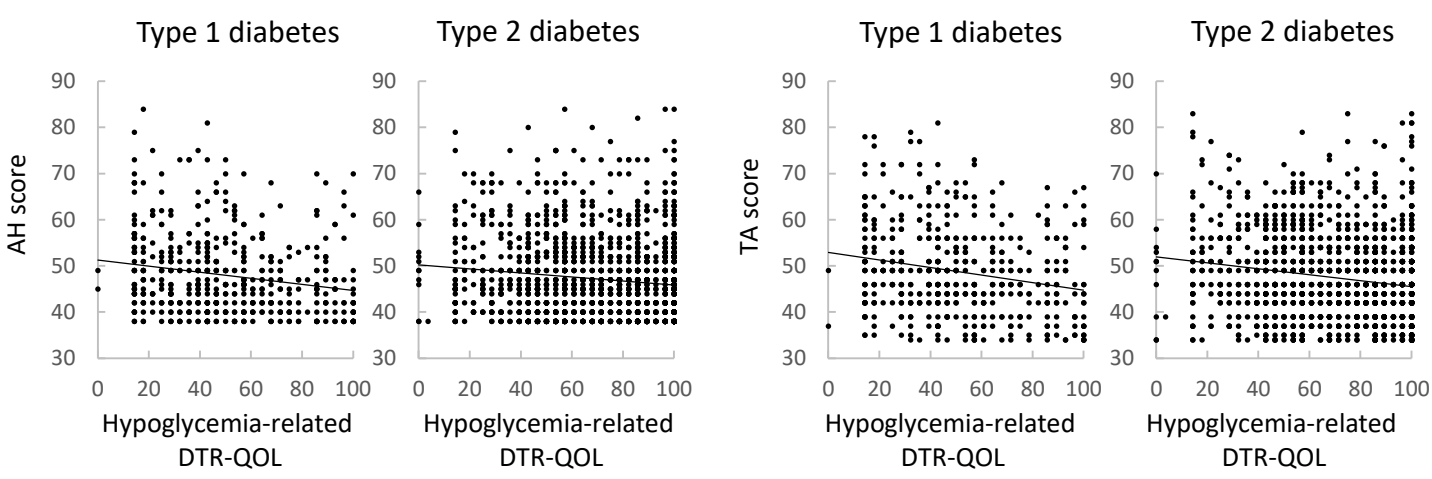

Figure S1. Hypoglycemia-related diabetes therapy-related QOL scores in type 1 and type 2 diabetes in the current study. Hypoglycemia-related DTR-QOL in T1D (black bar) and T2D (white bar) receiving different injection types are shown (A). Basal and bolus insulin combination (Basal + Bolus) (T1D, n=430 and T2D, n=483); basal insulin (Basal) (T1D, n=15 and T2D, n=414); bolus insulin (Bolus) (T1D, n=23 and T2D, n=55); mix insulin (Mix) (T1D, n=19 and T2D, n=306); continuous subcutaneous insulin infusion (CSII) (T1D, n=22 and T2D, n=0); GLP-1 receptor agonist (GLP-1RA), basal insulin and bolus insulin combination (GLP-1 + Basal + Bolus) (T1D, n=0 and T2D, n=31); GLP-1RA and basal insulin combination (GLP-1 + Basal) (T1D, n=0 and T2D, n=145); GLP-1RA and bolus insulin combination (GLP-1 + Bolus) (T1D, n=0 and T2D, n=4); GLP-1RA and mix insulin (GLP-1 and Mix) (T1D, n=0 and T2D, n=23); and GLP-1RA (GLP-1) (T1D, n=0 and T2D, n=152). \* indicates  $P < 0.05$  (vs type 1 diabetes). # and ¶ indicate  $P < 0.05$  (vs Basal + bolus); and  $P < 0.05$  (vs GLP-1 + Basal + bolus), respectively. Correlations of hypoglycemia-related DTR-QOL scores with scores of POMS2 Anger-Hostility (AH) (T1D  $r = -0.213$ ,  $P < 0.01$ ; and T2D  $r = -0.128$ ,  $P < 0.01$ ) and Tension-Anxiety (TA) (T1D  $r = -0.213$ ,  $P < 0.01$ ; and T2D  $r = -0.175$ ,  $P < 0.01$ ) are shown (B).
